1 Evidence for the priming effect in a planktonic  
2 estuarine microbial community

3 Andrew D. Steen\*

4 Department of Earth and Planetary Sciences  
5 University of Tennessee, Knoxville, USA

6 Lauren N. M. Quigley and Alison Buchan

7 Department of Microbiology  
8 University of Tennessee, Knoxville, USA

9 January 16, 2016

10 **Abstract**

11 The ‘priming effect’, in which addition of labile substances changes the rem-  
12 ineralization rate of recalcitrant organic matter, has been intensively studied  
13 in soils, but is less well-documented in aquatic systems. We investigated the  
14 extent to which additions of nutrients or labile organic carbon could influence  
15 remineralization rates of  $^{14}\text{C}$ -labeled, microbially-degraded, phytoplankton-  
16 derived organic matter (OM) in microcosms inoculated with microbial commu-  
17 nities drawn from Groves Creek Estuary in coastal Georgia, USA. We found  
18 that amendment with labile protein plus phosphorus increased remineralization  
19 rates of degraded, phytoplankton-derived OM by up to 100%, whereas acetate  
20 slightly decreased remineralization rates relative to an unamended control. Ad-  
21 dition of ammonium and phosphate induced a smaller effect, whereas addition  
22 of ammonium alone had no effect. Counterintuitively, alkaline phosphatase

---

\*Corresponding: [asteen1@utk.edu](mailto:asteen1@utk.edu)

23 activities increased in response to the addition of protein under P-replete con-  
24 ditions, indicating that production of enzymes unrelated to the labile priming  
25 compound may be a mechanism for the priming effect. The observed priming  
26 effect was transient: after 36 days of incubation roughly the same quantity of  
27 organic carbon had been mineralized in all treatments including no-addition  
28 controls. This timescale is on the order of the typical hydrologic residence times  
29 of well-flushed estuaries suggesting that priming in estuaries has the potential to  
30 influence whether OC is remineralized in situ or exported to the coastal ocean.

## 31 1 Introduction

32 The ‘priming effect’ refers to changes in the remineralization rate of less bioavail-  
33 able organic matter (OM) in response to the addition of more bioavailable sub-  
34 stances (Kuzyakov *et al.*, 2000; Jenkinson *et al.*, 1985). Although this effect  
35 has been the subject of intensive study in soils, it has only recently begun to  
36 attract substantial attention in aquatic systems (Guenet *et al.*, 2010; Bianchi,  
37 2011; Bianchi *et al.*, 2015). Among aquatic systems, the priming effect may  
38 be particularly relevant in estuaries, where labile organic matter (OM, for in-  
39 stance autochthonous production) mixes with more recalcitrant OM, such as  
40 aged terrestrial OM and recalcitrant marine OM (Guenet *et al.*, 2010).

41 Despite the voluminous evidence for the priming effect in soils (Kuzyakov,  
42 2010), the evidence for priming in aquatic systems is more ambiguous. Several  
43 studies using unlabeled labile organic matter to aquatic ecosystems showed by  
44 mass balance that additions of labile OM must have stimulated oxidation of more  
45 recalcitrant OM (De Haan, 1977; Shimp & Pfaender, 1985; Farjalla *et al.*, 2009)  
46 ; other investigators in freshwater environments have not found evidence for the  
47 priming effect (Bengtsson *et al.*, 2014; Catalán *et al.*, 2015), while Bianchi  
48 *et al.* (2015) observed priming of an estuarine bacterial isolate of *Acinetobacter*  
49 induced by a disaccharide or algal exudate. With the exception of Farjalla *et al.*  
50 (2009), which concerns a tropical lagoon, these studies were not performed in  
51 estuaries. Perhaps more importantly, the priming effect refers to changes in  
52 remineralization of recalcitrant OM in response to the addition of more labile  
53 OM and/or nutrients. It can be challenging to distinguish remineralization of  
54 labile versus recalcitrant OM using a mass-balance approach, in which only  
55 total fluxes of CO<sub>2</sub> are measured, because these approaches do not distinguish  
56 between oxidation of pre-existing, recalcitrant OM and added labile OM.

57 To assess the extent to which additions of labile OM and/or nutrients may  
58 influence the remineralization rates of recalcitrant OM in coastal estuaries, we  
59 performed microcosm experiments and monitored the remineralization of de-  
60 graded, phytoplankton-derived organic matter by a surface water microbial  
61 community collected from a temperate coastal estuary (Grove's Creek, Geor-  
62 gia, USA). Phytoplankton were labeled with  $^{14}\text{C}$  so fluxes of  $^{14}\text{CO}_2$  derived  
63 from phytoplankton-derived OM could unambiguously be distinguished from  
64 unlabeled  $\text{CO}_2$  derived from labile carbon. Periodic measurements of cell abun-  
65 dance, extracellular enzyme activities, and dissolved organic matter (DOM)  
66 fluorescence provided insight into the mechanisms of interactions between labile  
67 OM, nutrients, and phytoplankton -derived OM. These microcosms provided a  
68 tractable experimental system in which to assess the influence of simple (ac-  
69 etate) versus complex (protein) labile OM as well as nutrient addition (N or  
70 N+P) on degraded OM in estuaries.

## 71 2 Material & Methods

### 72 2.1 Generation of $^{14}\text{C}$ -labeled organic matter

73 The marine phytoplankter *Synechococcus* sp. strain CB0101 was grown on SN15  
74 medium (750 mL filtered seawater, 250 mL distilled water, 2.5 mL 3.53 M  
75  $\text{NaNO}_3$ , 2.6 mL 352 mM  $\text{K}_2\text{HPO}_4$ , 5.6 mL 342 mM  $\text{Na}_2\text{EDTA} \cdot 2\text{H}_2\text{O}$ , 2.6 mL  
76 37.7 mM  $\text{Na}_2\text{CO}_3$ , 1 mL 737  $\mu\text{M}$  cobalamin, 1 mL cyano trace metal solu-  
77 tion [400 mL distilled water, 100 mL 297 mM citric acid  $\cdot \text{H}_2\text{O}$ , 100 mL 229  
78 mM ferric ammonium citrate, 100 mL 27 mM  $\text{MnCl}_2 \cdot 4\text{H}_2\text{O}$ , 100 mL 17.8  
79 mM  $\text{Na}_2\text{MoO}_4 \cdot 2\text{H}_2\text{O}$ , 100 mL 859  $\mu\text{M}$   $\text{Co}(\text{NO}_3)_2 \cdot 6\text{H}_2\text{O}$ , 100 mL 7.7 mM  
80  $\text{ZnSO}_4 \cdot 7\text{H}_2\text{O}$ ) in a sealed, 4-liter flask in the presence of 0.5 mCi  $\text{NaH}^{14}\text{CO}_3^-$   
81 (MP Biomedicals, Santa Ana, CA) under artificial illumination on a 12-hr/12-  
82 hr cycle at 28°C. Stationary phase cultures were collected on 0.22  $\mu\text{M}$  Supor  
83 filters (Pall Corporation, Port Washington, NY) and resuspended in artificial  
84 seawater (ASW) (Sigma Sea Salts, 20 g/L [Sigma-Aldrich, St. Louis, MO]), pH  
85 8.1. A microbial community inoculum (collected at Bogue Sound, NC, from the  
86 dock of the Institute of Marine Sciences, University of North Carolina-Chapel  
87 Hill) was added to the phytoplankton biomass at 1% v/v and incubated in the  
88 dark at room temperature for 45 days. During the course of the incubation,  
89 the quantity of  $\text{O}^{14}\text{C}$  was periodically measured using a Perkin-Elmer TriCarb  
90 2910-TR liquid scintillation analyzer (Perkin-Elmer, Waltham, MA). The con-

91 centration of remaining OC was calculated by assuming the specific activity of  
92 degraded, phytoplankton-derived OC was equal to the specific activity of DI<sup>14</sup>C  
93 in the growth medium.

Phytoplankton-derived OC decay was modeled according to first-order kinetics:

$$OC_t = OC_0 e^{-kt} \quad (1)$$

94 where  $OC_t$  is the concentration of organic carbon at time  $t$ ,  $OC_0$  is the  
95 initial concentration of organic carbon, and  $k$  is the decay rate constant.  $k$  was  
96 determined from a nonlinear least squares regression of the OC concentration  
97 data to equation 1, and half-life was calculated as  $t_{1/2} = \ln(2)/k$ . At the end of  
98 this initial degradation phase, <sup>14</sup>C-POM was collected by filtration (0.22 μm),  
99 resuspended in ASW (salinity = 20) and heat killed by boiling for 5 min. The  
100 POM was allowed to return to room temperature and added to the microcosms  
101 as described below.

## 102 2.2 Microcosm incubations

103 Microcosms containing 1 mM PO<sup>14</sup>C were established using combinations of  
104 labile carbon, in the form of sodium acetate or protein as bovine serum albumin  
105 [BSA]), phosphorus as phosphate, and/or nitrogen as ammonium. This concentration  
106 was selected as it is consistent with OC concentrations in Georgia coastal  
107 estuarine systems from which the microbial community inoculum was derived  
108 (400-3000 μM C) (Alberts & Takács, 1999). BSA was selected as a representative  
109 protein source due to its well-defined chemical character and because it  
110 has frequently been used as a model protein in aquatic biogeochemical research.  
111 The labile carbon, N, and P were added at final concentrations of 500 μM-C,  
112 75 μM-N, and 4.7 μM-P, respectively. BSA contains both C and N, at a ratio  
113 of 6.6 C:N. Thus, the concentration of inorganic N added to select microcosms  
114 was chosen to match this ratio. The P concentration was selected based on the  
115 Redfield ratio for N:P of 16. The treatments were as follows: (1) sodium acetate  
116 (250 μM acetate or 500 μM-C); (2) protein plus P (500 μM-C as BSA, 75 μM-N  
117 as BSA, 4.7 μM K<sub>2</sub>HPO<sub>4</sub>); (3) N (75 μM NH<sub>4</sub>Cl); (4) N plus P (75 μM NH<sub>4</sub>Cl,  
118 4.7 μM- K<sub>2</sub>HPO<sub>4</sub>); and (5) control treatment with no C, N or P addition.

119 Microcosms were constructed as follows: the natural microbial community  
120 was obtained by pre-filtering a sample of estuarine water (from Skidaway Island,  
121 Georgia) using a Whatman GF/A filter (Whatman, GE Healthcare Biosciences Corporation,  
122 Piscataway, NJ; nominal pore size 1.6 μm) to reduce grazer

123 abundance. Prefiltered estuarine water was then filtered onto a 0.22  $\mu\text{m}$  filter  
124 (Supor-200 Pall Corp, Ann Arbor, MI). Cells captured on the second filter were  
125 resuspended into artificial seawater (Sigma Sea Salts, 15.0 g/L). The cell sus-  
126 pension was mixed and then 3.9 mL was dispensed into master mixes for each  
127 treatment with 383 mL artificial seawater (15.0 g/L, adjusted to pH 8.1) for a  
128 targeted cell density of  $10^6$  cells  $\text{mL}^{-1}$ . C, N and P were added to the master  
129 mixes as appropriate for each treatment, and  $\text{PO}^{14}\text{C}$  ( $0.3779 \mu\text{Ci}/1 \text{ mg PO}^{14}\text{C}$ )  
130 was added to each master mix for a final concentration of 1 mM OC. Sixty-five  
131 mL of each master mix was dispensed after gentle mixing into five replicate,  
132 125 mL serum vials and capped with gastight butyl stoppers (National Scien-  
133 tific Supply, Rockwood, TN), leaving 60 ml of atmospheric headspace. The  
134 microcosms were then incubated in an incubator at 25 °C in the dark.

### 135 **2.3 $^{14}\text{C}$ measurements**

136 Throughout the course of the first 36 days of incubation, samples were collected  
137 to monitor the concentrations of total  $^{14}\text{C}$  labeled organic carbon ( $\text{O}^{14}\text{C}$ ), par-  
138 ticulate organic carbon ( $\text{PO}^{14}\text{C}$ ) and dissolved inorganic carbon ( $\text{DI}^{14}\text{C}$ ). Total  
139  $\text{O}^{14}\text{C}$  was measured on days 0, 1, 2, 3, 6, 8, 10, 14, 17, 20, 22, 27, 30 and 36;  
140  $\text{PO}^{14}\text{C}$  was measured on days 0, 1, 2, 8, 14, 22, 30 and 36; and  $\text{DI}^{14}\text{C}$  was mea-  
141 sured on days 1, 2, 3, 6, 8, 10, 14, 17, 20, 22, 27, 30 and 36. In all cases, 0.5 ml  
142 samples were collected from serum vials using a 22.5-gauge needle and a 1 ml sy-  
143 ringe. To quantify total  $\text{O}^{14}\text{C}$ , the sample was added to a 20 ml scintillation vial  
144 preloaded with 50  $\mu\text{L}$  of 10%  $\text{H}_2\text{SO}_4$ , to drive off  $^{14}\text{CO}_2$ . Samples were allowed  
145 to degas for 15 minutes in a fume hood. Finally, 5 ml of Ecoscint scintillation  
146 cocktail (National Diagnostics, Mississauga, OH) was added to each serum vial.  
147 To quantify  $\text{PO}^{14}\text{C}$ , the samples were filtered through a 0.22  $\mu\text{m}$  filter polycar-  
148 bonate filter (Millipore, Billerica, MA). The filters were added to scintillation  
149 vials containing 5 mL of scintillation fluid. To quantify  $\text{DI}^{14}\text{C}$ , samples were  
150 initially stored with 50  $\mu\text{L}$  of 1 M NaOH. Just prior to measurement with a  
151 Perkin-Elmer TriCarb 2910-TR scintillation counter, samples were acidified by  
152 the addition of 0.5 mL of 0.2 M HCl.  $\text{CO}_2$  was trapped by bubbling a stream  
153 of air through the sample into a 20 mL scintillation vial with a Teflon-septum  
154 cap containing 10 mL modified Woellers solution (50% scintillation fluid/50%  
155  $\beta$ -phenylethylamine) for 20 minutes (Steen *et al.*, 2012). Tests with  $\text{NaH}^{14}\text{CO}_3$   
156 standards indicated  $^{14}\text{CO}_2$  trapping efficiency was at least 95%. For all scin-  
157 tillation measurements, vials were vortexed, allowed to ‘rest’ for 24-72 hours,

158 and vortexed again prior to measurement in order to minimize particle-induced  
159 quenching.

## 160 2.4 Modeling $^{14}\text{C}$ data

161 Total  $\text{O}^{14}\text{C}$  and  $\text{PO}^{14}\text{C}$  data were modeled assuming a reactive fraction, which  
162 decayed according to first-order kinetics, plus an unreactive fraction, in accor-  
163 dance with Eq. 1:

$$OC_t = (OC_0 - R) e^{-kt} + R \quad (2)$$

164 where  $OC_t$  is the concentration of total OC or POC at time  $t$ ,  $OC_0$  is the  
165 initial total OC or POC concentration,  $R$  is the concentration of recalcitrant OC  
166 or POC (modeled here as totally unreactive, in contrast with the way the term  
167 is used elsewhere in this paper),  $k$  is the first-order degradation rate constant,  
168 and  $t$  is the incubation time. These models were fit to the data using nonlinear  
169 least squares regressions, with  $k$  and  $R$  as fitted parameters and  $OC_0$  as a  
170 constant determined from measurements of the source phytoplankton (960  $\mu\text{M}$ -  
171 C for total OC, 926  $\mu\text{M}$ -C for POC).  $\text{CO}_2$  production was modeled similarly  
172 (Eq. 3), assuming that the only source of  $^{14}\text{CO}_2$  was the remineralization of  
173 degraded, phytoplankton-derived  $\text{O}^{14}\text{C}$ .

$$\text{CO}_{2,t} = A (1 - e^{-kt}) \quad (3)$$

174 95% confidence intervals were calculated using a Monte Carlo algorithm as  
175 implemented in the `propagate` R package. For the  $\text{CO}_2$  data, priming at time  
176  $t$  was defined as

$$p_t = \frac{\Sigma \text{CO}_{2,treatment,t}}{\Sigma \text{CO}_{2,control,t}} - 1 \quad (4)$$

177 Because observed  $^{14}\text{CO}_2$  concentrations were non-normally distributed and  
178 temporally autocorrelated, a custom permutation test was used to test the null  
179 hypothesis that the kinetics of  $\text{CO}_2$  production in each treatment were different  
180 from that in the control. In this approach, which was an implementation of  
181 the generic permutation test described by Good (2013, , p. 175), treatment and  
182 control labels at each timepoint were randomly shuffled, the resulting data for  
183 each reshuffled treatment were fit to Eq. 3. Priming for each permuted synthetic  
184 dataset was calculated as in Eq. 4 from the fits to Eq. 3. 95% confidence

185 intervals for the size of the null effect on each day, including days on which  
186  $^{14}\text{CO}_2$  was not measured, were calculated as the band containing 95% of priming  
187 observations out of an ensemble of 1000 randomly permuted data sets. This  
188 procedure was chosen to be insensitive to non-normality and autocorrelation,  
189 and to allow determination of whether priming occurred between measurement  
190 timepoints.

## 191 **2.5 Potential extracellular enzyme activities**

192 Activities of three different extracellular enzymes were assayed during the course  
193 of the incubations on days 0 (3 hours after the start of incubations), 7, 16, 21,  
194 29 and 35.  $\beta$ -glucosidase was assessed using 4-methylumbelliferyl- $\beta$ -D-gluco-  
195 pyranoside (MUB- $\beta$ -glu; Sigma-Aldrich, St. Louis, MO) at a final concentra-  
196 tion of 200  $\mu\text{M}$ . Leucyl aminopeptidase was assessed using L-leucine-7-amido-  
197 4-methylcoumarin (Leu-AMC; Chem-Impex International Inc., Wood Dale, IL)  
198 at a final concentration 400  $\mu\text{M}$ . Alkaline phosphatase was assessed using 4-  
199 methylumbelliferyl phosphate (MUB- $\text{PO}_4$ ; Chem-Impex International Inc, Wood  
200 Dale, IL) at a final concentration 50  $\mu\text{M}$ . At each measurement timepoint, 0.5  
201 ml of each sample was added to 0.5 ml artificial seawater buffer and a small  
202 volume of substrate (MUB- $\beta$ -glu: 20  $\mu\text{L}$ , Leu-AMC: 20  $\mu\text{L}$ , MUB- $\text{PO}_4$ : 50  $\mu\text{L}$ ).  
203 Cuvettes were capped and shaken and incubated at 22  $^\circ\text{C}$ . Fluorescence was  
204 periodically measured using a QuantiFluor ST single-cuvette fluorimeter over  
205 the course of approximately 2 hours as described in (Steen & Arnosti, 2013).  
206 Fluorescence values were calibrated with 4-methylumbelliferone and 7-amido-4-  
207 methylcoumarin as appropriate.

## 208 **2.6 Cell counts**

209 Cell densities were assessed on days 1, 3, 6, 10, 14, 17, 20, 22, 27, 30, 36 and 57  
210 days by microscopic direct counting following (Ortmann & Suttle, 2009). 0.5 mL  
211 of sample were taken from replicate A of each treatment and stored in cryovials.  
212 10  $\mu\text{L}$  of 25% filter-sterilized glutaraldehyde was added to the samples. Samples  
213 were stored at  $-80^\circ\text{C}$ . 100  $\mu\text{L}$  of sample was added to 900 L of water. 50  $\mu\text{L}$   
214 of SYBR gold (25X) was added to each sample. Samples were incubated in  
215 the dark for 15 minutes. Stained samples were vacuum filtered through a 0.22  
216  $\mu\text{m}$  filter. The filter was removed and placed on a glass slide. 20  $\mu\text{L}$  of anti-  
217 fade solution (480  $\mu\text{L}$  50% glycerol / 50% PBS; 20  $\mu\text{L}$  p-phenylenediamine) was  
218 added on top of the filter on the slide before placing a cover slip on the slide.

219 Bacteria were manually enumerated using a Leica CTR6000 microscope (Leica  
220 Microsystems, Buffalo Grove, IL).

## 221 **2.7 Fluorescence spectroscopy of dissolved organic matter**

222 Based on preliminary evidence that conditions in the treatments had begun  
223 to converge by 36 days, after 57 days we assessed the character of remaining  
224 DOM in selected samples using excitation-emission matrix (EEM) fluorescence  
225 spectroscopy. Due to the radioactive nature of the samples, fluorescence spectra  
226 were measured in sealed 1 cm × 1 cm methacrylate cuvettes (Fisher Scientific,  
227 Waltham, MA), which are advertised as transparent above 285 nm. In order  
228 to control for potential variability in optical properties among cuvettes, a Milli-  
229 Q water blank was measured in each cuvette prior to adding sample. For each  
230 measurement, a blank UV-vis absorbance scan was collected using Milli-Q water  
231 water on a Thermo Scientific Evolution 200 series spectrophotometer, and a  
232 blank fluorescence scan was collected on a Horiba Jobin Yvon Fluoromax 4  
233 fluorescence spectrometer (Horiba Scientific, Kyoto, Japan). The excitation  
234 scan was from 240-450 nm in 5 nm increments, and the emission scan was from  
235 250-550 nm in 2.5 nm increments. Finally, the Milli-Q water was removed from  
236 the cuvette, sample water was added and diluted 50% with Milli-Q water, and  
237 a sample fluorescence scan was collected using the same instrument settings.  
238 Sample 5B, which had an unacceptable blank, was discarded.

239 UV scans indicated that the methacrylate cuvettes began to absorb light  
240 below about 290 nm, so all excitation and emission wavelengths shorter than 295  
241 nm were discarded. Sample fluorescence spectra were then corrected for inner-  
242 filtering effects, blank-subtracted, normalized to the appropriate days Raman  
243 spectrum, and masked for Raman and Rayleigh scattering.

244 BSA was the only fluorescent priming compound. For that reason, an initial  
245 fluorescence sample was taken from the control treatment prior to the addition  
246 of any priming compounds, and a separate initial sample was taken from the  
247 +BSA+P treatment to assess the fluorescence characteristics of the added BSA.  
248 Duplicate final samples were taken after 57 days incubation from each treatment.

249 EEMs data analysis techniques can be highly sensitive to the specific condi-  
250 tions under which fluorescence EEMs were measured (Cory *et al.*, 2010). Since  
251 our EEMs were collected using a nonstandard cuvette type at a restricted set  
252 of wavelengths, we present the data qualitatively.



| Test  | Treatment | $k$ , day <sup>-1</sup> | $R$ , $\mu\text{M C}$ |
|-------|-----------|-------------------------|-----------------------|
| total | +acetate  | 0.32 +/- 0.14           | 630 +/- 29            |
| total | +BSA+P    | 0.33 +/- 0.11           | 590 +/- 25            |
| total | +N        | 0.24 +/- 0.076          | 640 +/- 24            |
| total | +N+P      | 0.44 +/- 0.2            | 680 +/- 22            |
| total | control   | 0.3 +/- 0.12            | 630 +/- 24            |
| POC   | +acetate  | 0.058 +/- 0.059         | 630 +/- 140           |
| POC   | +BSA+P    | 0.62 +/- 0.46           | 710 +/- 21            |
| POC   | +N        | 0.13 +/- 0.063          | 620 +/- 41            |
| POC   | +N+P      | 0.15 +/- 0.077          | 740 +/- 23            |
| POC   | control   | 0.19 +/- 0.062          | 670 +/- 19            |

Table 1: Modeled rate constants ( $k$ ) and modeled recalcitrant organic carbon concentration ( $R$ ) for total O<sup>14</sup>C and PO<sup>14</sup>C in each incubation.  $k$  and  $R$  were determined according to Eq. 2 (provided in the Methods). ??

## 2.8 Data analysis

Data were analyzed using the R statistical platform (R Core Team, 2015) and visualized using the ggplot2 package (Wickham, 2009). All raw data and data-processing scripts are available at <http://github.com/adsteen/priming2015>.

## 3 Results

### 3.1 Character of <sup>14</sup>C-labeled phytoplankton -derived OM

To generate less-reactive organic matter for microcosm studies, a culture of the marine phytoplankton species *Synechococcus* sp. CB101 was first grown in the presence of <sup>14</sup>C -labeled bicarbonate. The labeled biomass was then subject to degradation by an estuarine microbial community for 45 days. At the end of the incubation period, 45 +/- 4 % of the initial phytoplankton O<sup>14</sup>C remained (Fig. 1) consistent with a half-life for phytoplankton OC of 36 +/- 2 days based on a first-order decay kinetics.

### 3.2 Decay of total and particulate OC

Total <sup>14</sup>OC (i.e., D<sup>14</sup>OC+P<sup>14</sup>OC) and P<sup>14</sup>OC decayed according to similar kinetics (Fig. 2). POC in the +BSA+P treatment decayed with a faster rate constant (0.62 +/- 0.46 day<sup>-1</sup>) than any other treatment (in the range of 0.06-0.19 day<sup>-1</sup>, with error of 0.06-0.08 day<sup>-1</sup>). Substantial noise in the data obscured any other differences that might have existed in decay rate constant or

| Treatment | $A$ , $\mu\text{M C}$ | $k$ , $\text{day}^{-1}$ |
|-----------|-----------------------|-------------------------|
| +acetate  | 165 +/- 10.6          | 0.969 +/- 0.016         |
| +BSA+P    | 185 +/- 7.9           | 0.2023 +/- 0.0287       |
| +N        | 186 +/- 12.3          | 0.1001 +/- 0.017        |
| +N+P      | 173 +/- 8.4           | 0.1741 +/- 0.028        |
| control   | 185 +/- 10.0          | 0.1001 +/- 0.017        |

Table 2: odeled asymptotes ( $A$ ) and rate constants ( $k$ ) for  $^{14}\text{CO}_2$  production in each incubation.

272 concentrations of degraded, phytoplankton-derived OM.

### 273 **3.3 $\text{CO}_2$ production and priming**

274  $^{14}\text{CO}_2$  production was faster in the +BSA+P treatment than in the control, indicating a positive priming effect which was distinguishable from zero ( $p < 0.05$ )  
275 from day 1 through day 21 (Fig 3; Table ??). The +N+P treatment also increased the rate of  $^{14}\text{CO}_2$  production relative to control (Table 2). The rate  
276 constant for  $^{14}\text{CO}_2$  production was also larger in the +N+P treatment than  
277 the control ( $p < 0.05$ ) but the extent of priming in this treatment was never  
278 distinguishable from zero for an alpha of 0.05.

281  $^{14}\text{CO}_2$  production in the +acetate treatment was slightly slower than in the  
282 control, consistent with a negative or anti-priming effect; this effect was significant  
283 between day 14 and day 24, and the  $^{14}\text{CO}_2$  production in the +N treatment  
284 was indistinguishable from the control. While the magnitude of anti-priming in  
285 the +acetate treatment was nearly constant throughout the incubation, positive  
286 priming in the +BSA+P treatment (and the +N+P treatments, if the observed  
287 priming in that treatment was not due to experimental error) was maximal at  
288 the first timepoint after labile organic matter was added, and decreased steadily  
289 thereafter. After 30-36 days of incubation, the total amount of  $^{14}\text{CO}_2$  remineralized  
290 was indistinguishable among all treatments.

291 After 36 days of incubation, our quantification indicated that more TOC was  
292 removed from the system (320-370  $\mu\text{M}$ ) than  $\text{CO}_2$  was produced (165-186  $\mu\text{M}$ ).  
293 The average deficit of  $147 \pm 30$   $\mu\text{M}$  likely represents biofilms attached to the  
294 incubation vessel walls, which would have been missed by our sampling method.

### 295 **3.4 Cell abundance and extracellular enzymes**

296 Cell abundances in the incubations increased from approx.  $1.0 \times 10^6$  cells ml<sup>-1</sup>  
297 in each treatment after 1 day of incubation to  $1.4\text{-}2.5 \times 10^6$  cells ml<sup>-1</sup> after 57  
298 days of incubation, with relatively little difference among treatments (Fig 4).  
299 However, substantial differences among treatments occurred during the course  
300 of the incubation. In the +BSA+P treatment, cell densities quickly increased  
301 to a maximum of  $1.2 \times 10^7$  cells ml<sup>-1</sup> after 3 days and then decreased steadily  
302 through the end of the incubation. Other treatments were characterized by  
303 an initial peak at 6 days incubation. Cell abundance in the +N treatment  
304 remained roughly constant after 6 days, whereas the control, +acetate, and  
305 +N+P treatments, followed by a minimum in cell abundance at approximately  
306 17 days, and, in the case of the +acetate treatment, a second, larger peak in  
307 cell abundance at 27 days.

308 Potential activities of extracellular enzymes also varied as a function of both  
309 time and treatment (Fig 5).  $\beta$ -glucosidase activities were generally indistinguish-  
310 able from zero throughout the incubation for all treatments. Leucyl aminopep-  
311 tidase activities were far greater in the +BSA+P treatment than in any other  
312 treatment, although activities were significantly greater than zero in each treat-  
313 ment. The timecourse of leucyl aminopeptidase activities followed cell counts  
314 closely. Alkaline phosphatase activities were also greater in the +BSA+P treat-  
315 ment than in any other treatment, but the timecourse of activities followed a  
316 different path than the timecourse of cell counts: the maximum value was at  
317 17 days rather than 6 days, and the peak in activities was less dramatic than  
318 either the peak in leucyl aminopeptidase activities or cell counts. While most  
319 measures of biological activity ceased at day 35 due to limited sample volume, a  
320 final measurement of cell density was made at day 57 and found to range from  
321  $1.4 \times 10^6$  cells ml<sup>-1</sup> (+acetate treatment) to  $2.5 \times 10^6$  cells ml<sup>-1</sup> (+BSA+P,  
322 +N, +N+P treatments).

### 323 **3.5 Chemical transformations of DOM**

324 At the conclusion of the incubation period (day 57), the remaining sample vol-  
325 ume was sacrificed for excitation-emission matrix (EEM) fluorescence spectro-  
326 scopic analysis and compared with samples preserved from the first day of the  
327 incubation. The intensity of the FDOM signal increased in all samples over the  
328 course of the incubation (Fig 6). The nature of the signal, as revealed by EEM,  
329 however, did not vary much by treatment, with the exception of the +BSA+P

330 treatment. In this treatment, the protein peak from the added BSA (visible at  
331 the bottom of the panel for the initial +BSA+P treatment in Fig 6) dominated  
332 the phytoplankton degraded, phytoplankton-derived OM signal. By the end of  
333 the incubation, however, there was no distinct protein signal, and the overall  
334 form of the EEM in the +BSA+P treatment was considerably more intense but  
335 similarly shaped to the signals from the other treatments.

## 336 4 Discussion

### 337 4.1 Reactivity of source O<sup>14</sup>C

338 For this study, we selected a representative strain of phytoplankton, *Synechococ-*  
339 *cus* sp. CB0101, which was originally isolated from the Chesapeake Bay (Marsan  
340 *et al.*, 2014). *Synechococcus* can account for a substantial fraction of total  
341 phototrophic cells, chlorophyll *a*, and primary production in estuaries (Ning  
342 *et al.*, 2000; Pan *et al.*, 2007; Wang *et al.*, 2011). During preparation, the  
343 phytoplankton-derived organic matter used in this experiment decayed with a  
344 half-life of  $36 \pm 2$  days, consistent with semi-labile estuarine DOC (Raymond  
345 & Bauer, 2000). Although the phytoplankton-OM decay data here were too  
346 sparse to accurately model with a multi-G model (Fig. 1), the success of more  
347 complex diagenetic models indicates that organic matter becomes less reactive  
348 as it is oxidized by microorganisms (e.g., Røy *et al.*, 2012). It is therefore likely  
349 that the remaining organic matter at the end of the pre-degradation phase was  
350 less reactive than the half-life of 36 days would suggest.

### 351 4.2 Priming as a transient effect

352 Recalcitrant OM was remineralized up to 100% faster in the +BSA+P treat-  
353 ment than in the control, but this effect was transient (Fig 3). After about  
354 30 days, roughly the same amount of recalcitrant OM had been mineralized in  
355 each experiment. Cell densities (Fig 4) and enzyme activities (Fig 5) also con-  
356 verged towards the end of the experiment. Fluorescence spectroscopy indicated  
357 that, after 57 days of incubation, the composition of fluorescent DOM was in-  
358 distinguishable among all treatments except for +BSA+P. In that treatment a  
359 large protein-like peak persisted at the end of the incubation. Other than the  
360 large protein-like peak, post-incubation fluorescence spectra of the +BSA+P  
361 treatment were qualitatively similar to post-incubation spectra for the other

362 treatments (Fig 6).

363 Interestingly, Catalán *et al.* (2015) recently found no evidence of priming in  
364 Swedish lakes. That study contained a very large number of experimental treat-  
365 ments, but only a single timepoint, after 35 days of incubation, whereas in the  
366 experiment reported here, priming effects were no longer observable after 21 -  
367 24 days. The priming effect arises from interactions between disparate microor-  
368 ganisms and pools of organic carbon and nutrients (Blagodatskaya & Kuzyakov,  
369 2008). Given the complexities of these interactions, it is likely that the magni-  
370 tude, direction and timing of priming varies substantially among aquatic envi-  
371 ronments.

### 372 **4.3 Priming versus stoichiometric control on CO<sub>2</sub> produc-** 373 **tion**

374 The results provide evidence of faster OM mineralization in the presence of  
375 added protein plus phosphate (+BSA+P treatment) and possibly added inor-  
376 ganic N and phosphate (+N+P), but not inorganic N alone (+N). These data  
377 suggest that heterotrophic metabolism of recalcitrant OM was limited in part  
378 by phosphorus. It is important to note that the factors limiting the remineral-  
379 ization of recalcitrant OM may differ from the factors limiting overall bacterial  
380 production. Because this experiment involves comparing treatments that re-  
381 ceived additional nutrient inputs to a control in which no nutrients were added,  
382 it is important to distinguish potential stoichiometric effects of nutrient addi-  
383 tion from a priming effect. The addition of N and P in the +BSA+P, +N+P,  
384 and +N treatments could be expected to spur remineralization of excess <sup>14</sup>CO<sub>2</sub>  
385 relative to the control, purely to maintain stoichiometric balance. However, two  
386 lines of evidence indicate that some fraction of the excess <sup>14</sup>CO<sub>2</sub> observed in the  
387 +BSA+P treatment was due to priming by BSA. First, First, the magnitude of  
388 the effect in the +BSA+P treatment was roughly twice as large as in the +N+P  
389 treatment, despite the identical N:P stoichiometry in the two treatments. Sec-  
390 ond, the fact that the effects observed here were transient is difficult to reconcile  
391 with stoichiometric effects: we are not aware of a mechanism by which stoichio-  
392 metric effects could cause the <sup>14</sup>CO<sub>2</sub> production in the control to ‘catch up’ to  
393 that in the experimental treatments, as we observed here, without additional  
394 input of nutrients, whereas priming effects are well-known to be time-dependent  
395 (Blagodatskaya & Kuzyakov, 2008).

#### 396 4.4 Potential mechanism of priming

397 Cell abundances, leucyl aminopeptidase activity and phosphatase activity all  
398 increased substantially and rapidly in the +BSA+P treatment (Figs 5 and 6).  
399 This is consistent with a scenario in which cells grew rapidly using BSA as a sub-  
400 strate, producing excess leucyl aminopeptidase, which released bioavailable com-  
401 pounds (e.g. amino acids) from the protein-like organic matter that comprises  
402 the major fraction of organic N in degraded organic matter (Nunn *et al.*, 2010;  
403 McCarthy *et al.*, 1997). Kuzyakov *et al.* (2000) cite changes  
404 in microbial biomass as a primary mechanism of priming in soils. Surprisingly,  
405 alkaline phosphatase activity also increased in the +BSA+P treatment, despite  
406 the substantial addition of P in that treatment. Some marine bacteria produce  
407 alkaline phosphatase constitutively (Hassan & Pratt, 1977), which may account  
408 for the observed increase in alkaline phosphatase activity in the +BSA+P treat-  
409 ment here. Alternatively, since the peak in phosphatase activity occurred at 17  
410 days while cell abundance was declining, it is possible that the extracellular  
411 phosphatase enzymes may have been released from cytoplasm as cells lysed fol-  
412 lowing the peak in cell abundance at day 3. Alkaline phosphatase can cleave  
413 phosphate from phosphoproteins (Mellgren *et al.*, 1977), so the extra peptidases  
414 expressed in the +BSA+P treatment may have liberated phosphoproteins  
415 which induced expression of alkaline phosphatase-like enzymes. In any case, the  
416 observed increase in the activity of phosphatase provides mechanistic support  
417 for the hypothesis that addition of one compound can spur hydrolysis of chem-  
418 ically unrelated compounds, thereby making them bioavailable. Many aquatic  
419 extracellular peptidases (protein-degrading enzymes) are relatively promiscuous  
420 (Steen *et al.*, 2015) which suggests that peptidases produced in order to degrade  
421 BSA likely hydrolyzed some fraction of the recalcitrant O<sup>14</sup>C as well.

422 The microcosms used in this study contained planktonic cells, suspended  
423 particles and flocs, and probably biofilms attached to incubation vessel walls.  
424 The physiological state of bacteria growing attached to surfaces is dramatically  
425 different than when they are unattached (reviewed in Costerton *et al.* Costerton  
426 *et al.* (1995)). and is, therefore, an important consideration for microbial  
427 transformation studies. It is possible that the mechanisms and extent of priming  
428 differed among these microenvironments, as suggested by Catalán *et al.* Catalán  
429 *et al.* (2015).

## 430 **4.5 Relevance to carbon processing in estuaries**

431 Priming in this study was substantial but transient. The relevant priming  
432 timescale observed here of days-to-tens-of-days, coincides with typical hydro-  
433 logic residence times of passive-margin estuaries (Alber & Sheldon, 1999). Prim-  
434 ing in estuaries may therefore influence whether OC is remineralized in situ or  
435 exported to the coastal ocean.

436 Is the priming effect that we observed in microcosm incubations with defined  
437 substrate additions relevant to natural systems? In estuaries, degraded OM (e.g.  
438 terrestrial OM or dissolved remnants of coastal phytoplankton blooms) can come  
439 into contact with fresh DOC produced in situ (Raymond & Bauer, 2001). Marsh  
440 grasses exude substantial amounts of labile compounds, including acetate (Hines  
441 *et al.*, 1994; Jones, 1998), and phytoplankton growing in estuaries likely also  
442 serve as a source of labile OM (Carlson & Hansell, 2015). Here, we have shown  
443 that estuarine microbial communities are capable of being ‘primed’ (or ‘anti-  
444 primed’) by the addition of labile OM and nutrients to mineralize recalcitrant  
445 OM more quickly. Therefore, we hypothesize that inputs of labile OM and  
446 nutrients to estuaries may influence fluxes of organic carbon between estuaries  
447 and the coastal ocean. Given the numerous environmental variables that cannot  
448 be accounted for in lab-scale experiments, this hypothesis should be tested with  
449 field-scale experiments.

## 450 **Disclosure/Conflict-of-Interest Statement**

451 The authors declare that the research was conducted in the absence of any  
452 commercial or financial relationships that could be construed as a potential  
453 conflict of interest.

## 454 **Author Contributions**

455 ADS and AB designed the experiment. ADS, LNMQ and AB performed the  
456 experiment, analyzed the data, and wrote the manuscript.

## 457 **Acknowledgments**

458 We thank Aron Stubbins (Skidaway Institute of Oceanography) and Mike Piehler  
459 (University of North Carolina Institute of Marine Sciences) for help collecting

460 microbial inocula. Steven Wilhelm (UT-Microbiology) shared lab space for ex-  
461 periments, Annette Engel shared the fluorimeter used to collect DOM fluores-  
462 cence spectra, and Kathleen Brannen-Donnelly gave valuable help with data  
463 processing.

464 *Funding:* This work was supported by NSF grant OCE-1357242 to ADS and  
465 AB.

## 466 References

- 467 Alber, M, & Sheldon, J E. 1999. Use of a date-specific method to examine  
468 variability in the flushing times of Georgia estuaries. *Estuarine Coastal and*  
469 *Shelf Science*, **49**(4), 469–482.
- 470 Alberts, J.J., & Takács, M. 1999. Importance of humic substances for carbon  
471 and nitrogen transport into southeastern United States estuaries. *Organic*  
472 *Geochemistry*, **30**(6), 385–395.
- 473 Bengtsson, Mia M, Wagner, Karoline, Burns, Nancy R, Herberg, Erik R, Wanek,  
474 Wolfgang, Kaplan, Louis a, & Battin, Tom J. 2014. No evidence of aquatic  
475 priming effects in hyporheic zone microcosms. *Scientific reports*, **4**, 5187.
- 476 Bianchi, T. S. 2011. The role of terrestrially derived organic carbon in the  
477 coastal ocean: A changing paradigm and the priming effect. *Proceedings of*  
478 *the National Academy of Sciences*, **108**(49), 19473–19481.
- 479 Bianchi, Thomas S., Thornton, Daniel C. O., Yvon-Lewis, Shari A., King,  
480 Gary M., Eglinton, Timothy I., Shields, Michael R., Ward, Nicholas D., &  
481 Curtis, Jason. 2015. Positive priming of terrestrially derived dissolved or-  
482 ganic matter in a freshwater microcosm system. *Geophysical Research Letters*,  
483 **42**(13), 5460–5467.
- 484 Blagodatskaya, E., & Kuzyakov, Y. 2008. Mechanisms of real and apparent  
485 priming effects and their dependence on soil microbial biomass and commu-  
486 nity structure: critical review. *Biology and Fertility Soils*, **45**(2), 115–131.
- 487 Carlson, Craig A., & Hansell, Dennis A. 2015. DOM Sources, Sinks and Re-  
488 activity. *Pages 66–126 of:* Hansell, Dennis A., & Carlson, Craig A. (eds),  
489 *Biogeochemistry of Marine Dissolved Organic Matter*, second edition edn.



- 490 Catalán, Núria, Kellerman, Anne M, Peter, Hannes, Carmona, Francesc, &  
491 Tranvik, Lars J. 2015. Absence of a priming effect on dissolved organic carbon  
492 degradation in lake water. *Limnology and Oceanography*, **60**(1), 159–168.
- 493 Cory, Rose M., Miller, Matthew P., McKnight, Diane M., Guerard, Jennifer J.,  
494 & Miller, Penney L. 2010. Effect of instrument-specific response on the analysis  
495 of fulvic acid fluorescence spectra. *Limnology and Oceanography: Methods*,  
496 **8**(2), 67–78.
- 497 Costerton, J W, Lewandowski, Z, Caldwell, D E, Korber, D R, & Lappin-Scott,  
498 H M. 1995. Microbial biofilms. *Annual Review of Microbiology*, **49**(jan),  
499 711–45.
- 500 De Haan, H. 1977. Effect of benzoate on microbial decomposition of fulvic acids  
501 in Tjeukemeer (the Netherlands). *Limnology and Oceanography*, **22**(1), 38–44.
- 502 Farjalla, Vinicius F, Marinho, Claudio C, Faria, Bias M, Amado, André M,  
503 Esteves, Francisco de A, Bozelli, Reinaldo L, & Giroldo, Danilo. 2009. Syn-  
504 ergy of fresh and accumulated organic matter to bacterial growth. *Microbial*  
505 *Ecology*, **57**(4), 657–66.
- 506 Good, Phillip. 2013. *Permutation Tests: A Practical Guide to Resampling Meth-*  
507 *ods for Testing Hypotheses*. Springer Science & Business Media.
- 508 Guenet, B, Danger, M, Abbadie, L, & Lacroix, G. 2010. Priming effect: bridging  
509 the gap between terrestrial and aquatic ecology. *Ecology*, **91**(10), 2850–2861.
- 510 Hassan, H M, & Pratt, D. 1977. Biochemical and physiological properties of  
511 alkaline phosphatases in five isolates of marine bacteria. *Journal of Bacteri-*  
512 *ology*, **129**(3), 1607–1612.
- 513 Hines, Mark E., Banta, Gary T., Giblin, Anne E., Hobbie, John E., & Tugel,  
514 Joyce B. 1994. Acetate concentrations and oxidation in salt-marsh sediments.  
515 *Limnology and Oceanography*, **39**(1), 140–148.
- 516 Jenkinson, D. S., Fox, R. H., & Rayner, J. H. 1985. Interactions between  
517 fertilizer nitrogen and soil nitrogen-the so-called priming effect. *Journal of*  
518 *Soil Science*, **36**(3), 425–444.
- 519 Jones, David L. 1998. Organic acids in the rhizosphere - A critical review. *Plant*  
520 *and Soil*, **205**(1), 25–44.

- 521 Kuzyakov, Y., Friedel, J. K., & Stahr, K. 2000. Review of mechanisms and  
522 quantification of priming effects. *Soil Biology and Biochemistry*, **32**(11-12),  
523 1485–1498.
- 524 Kuzyakov, Yakov. 2010. Priming effects: Interactions between living and dead  
525 organic matter. *Soil Biology and Biochemistry*, **42**(9), 1363–1371.
- 526 Marsan, David, Wommack, K Eric, Ravel, Jacques, & Chen, Feng. 2014. Draft  
527 Genome Sequence of *Synechococcus* sp. Strain CB0101, Isolated From the  
528 Chesapeake Bay Estuary. *Genome Announcements*, **2**(1), e01111–13.
- 529 McCarthy, Matthew, Pratum, Tom, Hedges, John, & Benner, Ronald. 1997.  
530 Chemical composition of dissolved organic nitrogen in the ocean. *Nature*,  
531 **390**(6656), 150–154.
- 532 Mellgren, R L, Slaughter, G R, & Thomas, J A. 1977. Dephosphorylation of  
533 phosphoproteins by *Escherichia coli* alkaline phosphatase. *Journal of Biolog-  
534 ical Chemistry*, **252**(17), 6082–6089.
- 535 Ning, Xiuren, Cloern, James E., & Cole, Brian E. 2000. Spatial and tempo-  
536 ral variability of picocyanobacteria *Synechococcus* sp. in San Francisco Bay.  
537 *Limnology and Oceanography*, **45**(3), 695–702.
- 538 Nunn, Brook L, Ting, Ying S, Malmstrom, Lars, Tsai, Yihsuan S, Squier, An-  
539 gela, Goodlett, David R, & Harvey, H Rodger. 2010. The path to preservation:  
540 Using proteomics to decipher the fate of diatom proteins during microbial  
541 degradation. *Limnology and Oceanography*, **55**(4), 1790–1804.
- 542 Ortmann, Alice C, & Suttle, Curtis A. 2009. Determination of Virus Abundance  
543 by Epifluorescence Microscopy. *Pages 87–95 of: Bacteriophages - Methods  
544 and Protocols, Volume 1: Isolation, Characterization, and Interactions*, vol.  
545 501.
- 546 Pan, L. A., Zhang, J., & Zhang, L. H. 2007. Picophytoplankton, nanophyto-  
547 plankton, heterotrophic bacteria and viruses in the Changjiang Estuary and  
548 adjacent coastal waters. *Journal of Plankton Research*, **29**(2), 187–197.
- 549 R Core Team. 2015. *R: A Language and Environment for Statistical Computing*.  
550 R Foundation for Statistical Computing, Vienna, Austria.

- 551 Raymond, Peter A., & Bauer, James E. 2000. Bacterial consumption of DOC  
552 during transport through a temperate estuary. *Aquatic Microbial Ecology*,  
553 **22**(1), 1–12.
- 554 Raymond, Peter A., & Bauer, James E. 2001. DOC cycling in a temperate estu-  
555 ary: A mass balance approach using natural  $^{14}\text{C}$  and  $^{13}\text{C}$  isotopes. *Limnology*  
556 *and Oceanography*, **46**(3), 655–667.
- 557 Røy, Hans, Kallmeyer, Jens, Adhikari, Rishi Ram, Pockalny, Robert, Jørgensen,  
558 Bo Barker, & D'Hondt, Steven. 2012. Aerobic microbial respiration in 86-  
559 million-year-old deep-sea red clay. *Science (New York, N.Y.)*, **336**(6083),  
560 922–5.
- 561 Shimp, Robert, & Pfaender, Frederic K. 1985. Influence of Naturally Occur-  
562 ring Humic Acids on Biodegradation of Monosubstituted Phenols by Aquatic  
563 Bacteria. *Applied and Environmental Microbiology*, **49**(2), 402–407.
- 564 Steen, Andrew D., & Arnosti, Carol. 2013. Extracellular peptidase and carbo-  
565 hydrate hydrolase activities in an Arctic fjord (Smeerenburgfjord, Svalbard).  
566 *Aquatic Microbial Ecology*, **69**(2), 93–99.
- 567 Steen, Andrew D., Ziervogel, Kai, Ghobrial, Sherif, & Arnosti, Carol. 2012.  
568 Functional variation among polysaccharide-hydrolyzing microbial communi-  
569 ties in the Gulf of Mexico. *Marine Chemistry*, **138-139**(jul), 13–20.
- 570 Steen, Andrew D., Vazin, Jasmine P., Hagen, Shane M., Mulligan, Katherine H.,  
571 & Wilhelm, Steven W. 2015. Substrate specificity of aquatic extracellular pep-  
572 tidases assessed by competitive inhibition assays using synthetic substrates.  
573 *Aquatic Microbial Ecology*, **75**(3), 271–281.
- 574 Wang, Kui, Wommack, K Eric, & Chen, Feng. 2011. Abundance and distribu-  
575 tion of *Synechococcus* spp. and cyanophages in the Chesapeake Bay. *Applied*  
576 *and environmental microbiology*, **77**(21), 7459–68.
- 577 Wickham, Hadley. 2009. *ggplot2: Elegant Graphics for Data Analysis*. New  
578 York: Springer.

## 579 Figures

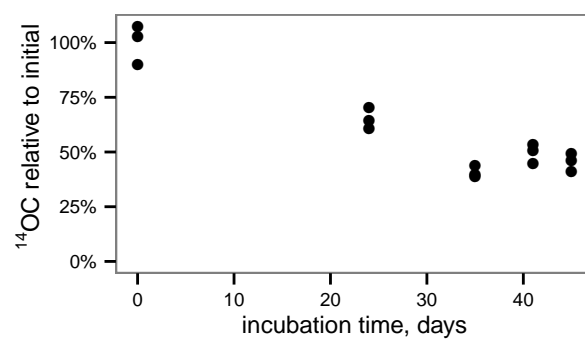

**Figure 1.** Degradation of  $^{14}\text{C}$ -labeled phytoplankton -derived OM by an estuarine microbial community yields relatively recalcitrant,  $^{14}\text{C}$ -labeled OM for use in microcosm experiments.

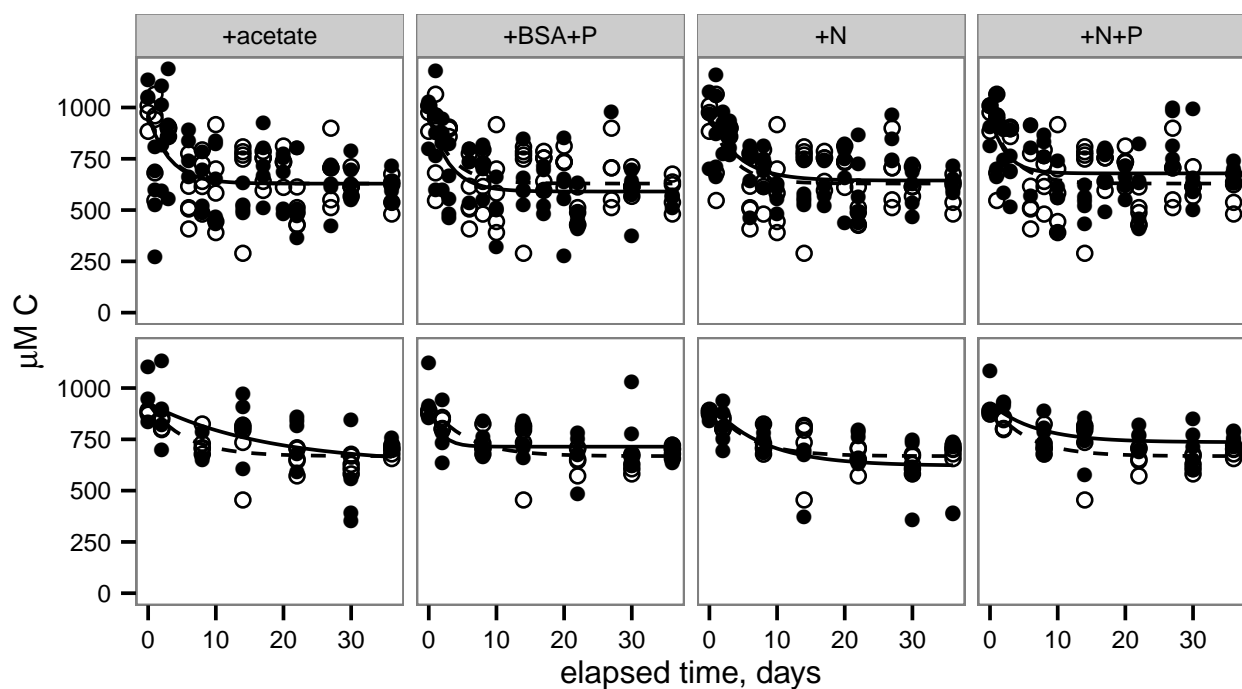

**Figure 2.** Degradation of  $^{14}\text{C}$ -labeled phytoplankton-derived OM by an estuarine microbial community yields relatively recalcitrant,  $^{14}\text{C}$ -labeled OM for use in microcosm experiments. Remineralization of total OC (top row) and particulate OC (bottom row). Lines indicate the nonlinear least squares regressions to Eq. 2 (provided in Methods). Filled circles and solid lines indicate data from each treatment, as indicated across the top panels. Open circles and dashed lines indicate control data and are repeated in each panel for reference.

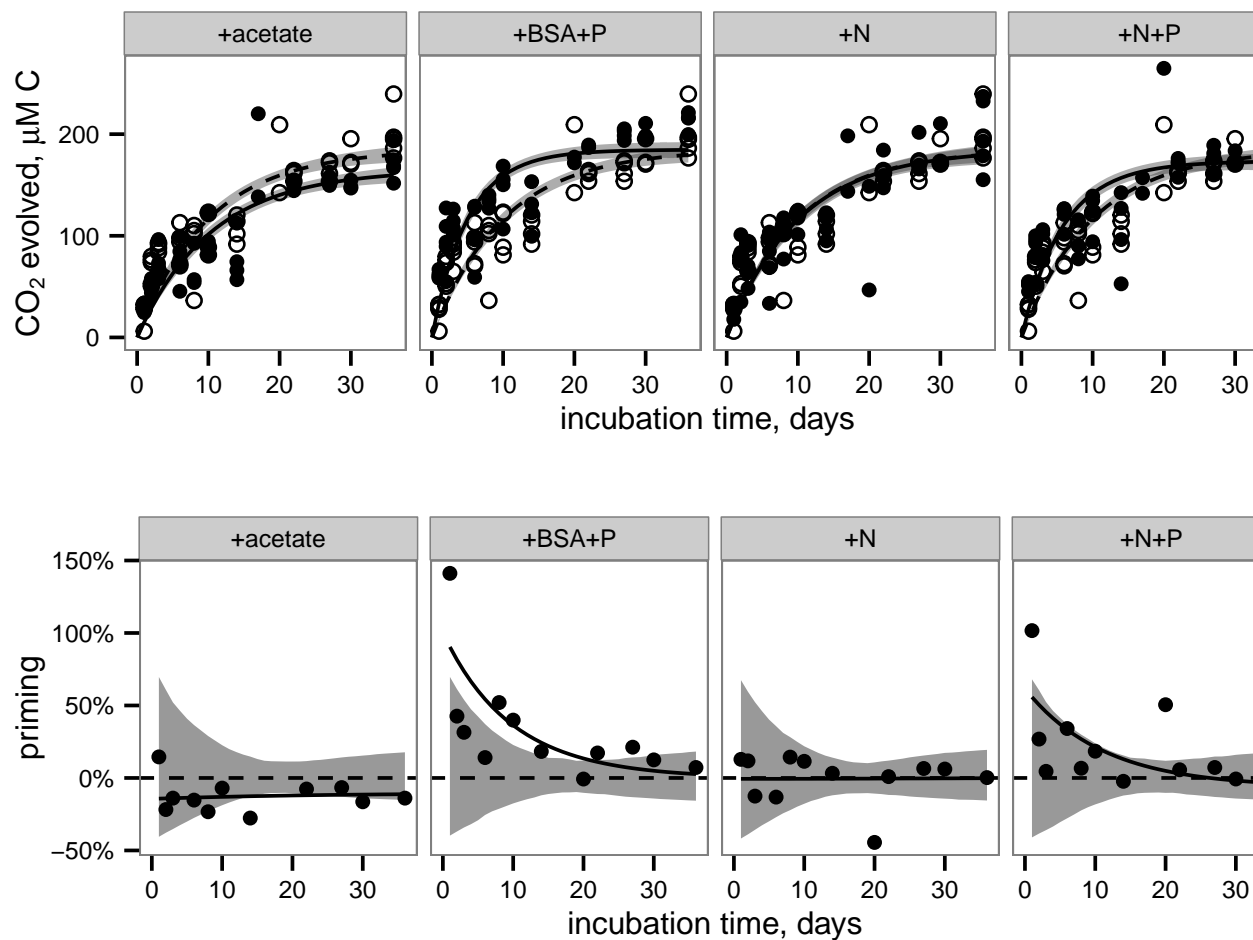

**Figure 3.** CO<sub>2</sub> production (top row) and priming (bottom row) in each treatment. Top row: Filled circles and solid indicate data from treatments. Open circles and dashed lines indicate data from the control (i.e., no added compounds) and are repeated in each panel for reference. Lines indicate best fits to Eq. 3 (provided in Methods). Shaded bands indicate standard error of the model fits estimated by a Monte Carlo technique. Bottom row: Priming, calculated according to Eq. 4 (provided in Methods). Circles indicate priming calculated from the average CO<sub>2</sub> concentrations at each timepoint. Solid lines represent priming calculated from the fit lines shown in the top panel for each corresponding treatment. Shaded bands indicate the region that is indistinguishable from zero priming.

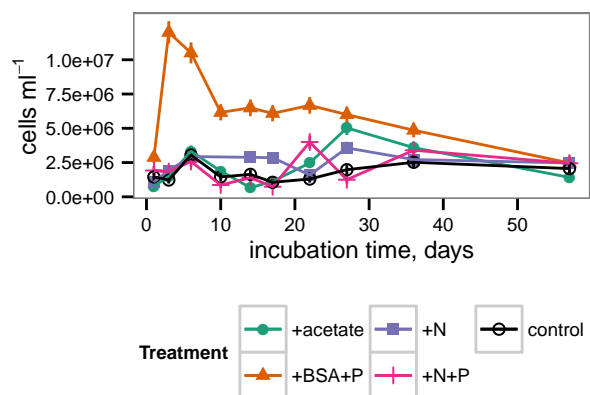

**Figure 4.** Cell abundance during the incubation. Error bars represent standard error of cell counts.

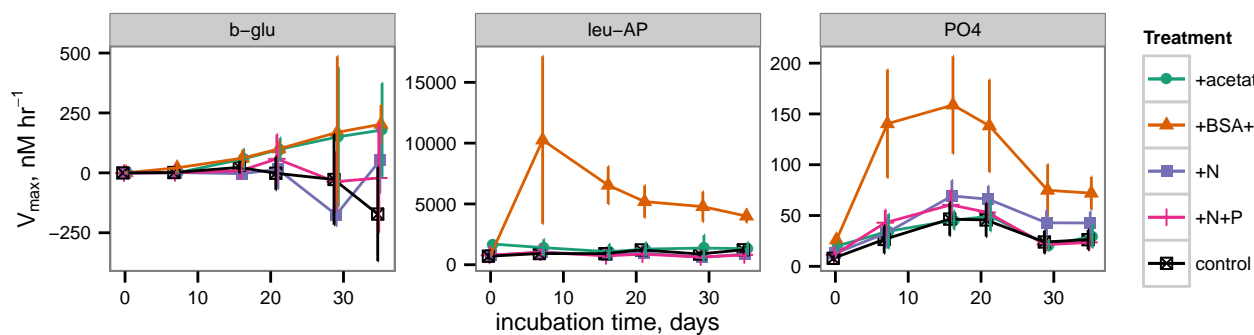

**Figure 5.** Potential extracellular enzyme activities during the incubation. b-glu represents  $\beta$ -glucosidase, leu-AP represents leucyl aminopeptidase, and PO4 represents alkaline phosphatase.

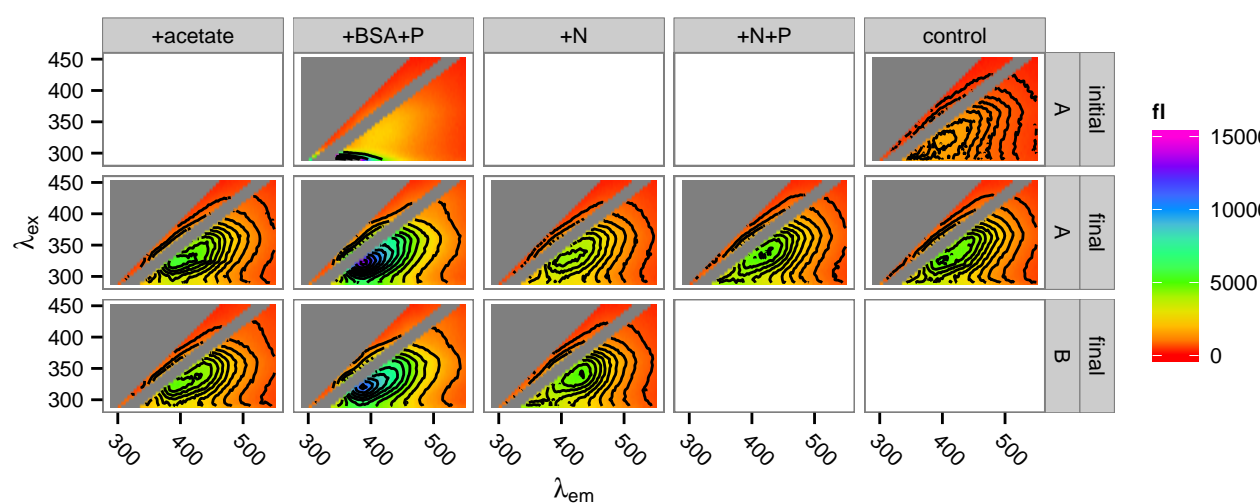

**Figure 6.** Fluorescence spectra of incubation DOM at the start and at the end of the incubations. Top row: spectra of the +BSA+P treatment and the control treatment at time zero ('initial'). Middle and bottom rows: replicate spectra after 57 days incubation ('final'). Insufficient sample remained for duplicate measurement of the +N+P and control samples after 57 days. 'A' and 'B' in the right-side panel labeled refer to incubation replicates.
